# Supplementary material for: Efficient Feature Extraction from High Sparse Binary Genotype Data for Genetic Risk Prediction by Deep Learning Method
Source: Preprints.org preprint supplement (doi:10.20944/preprints202208.0201.v1), 2022-08-10

Variant Classification

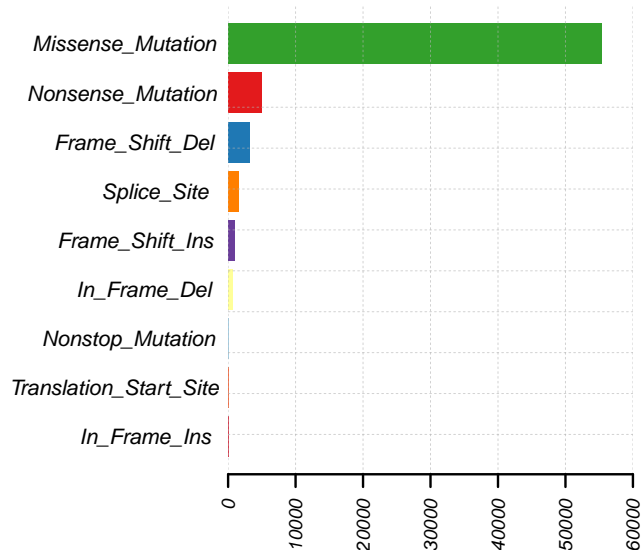

Variant Type

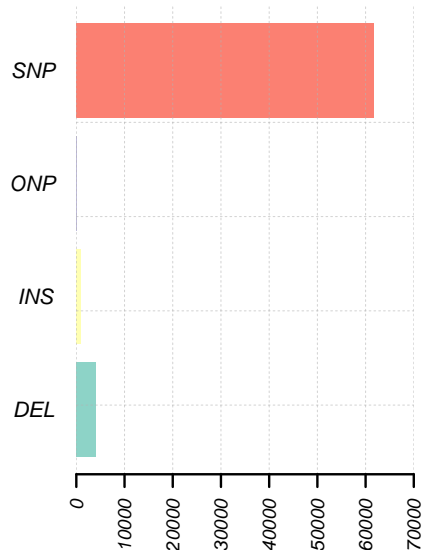

SNV Class

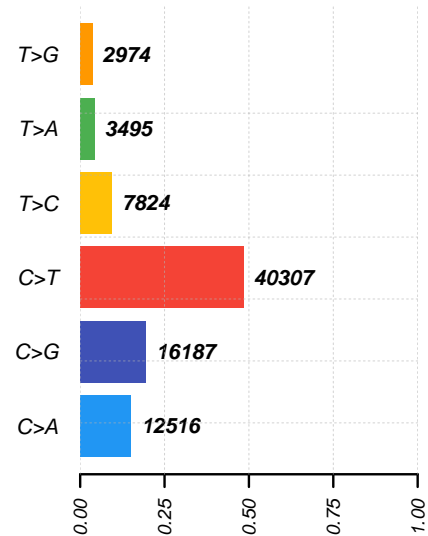Variants per sample  
Median: 34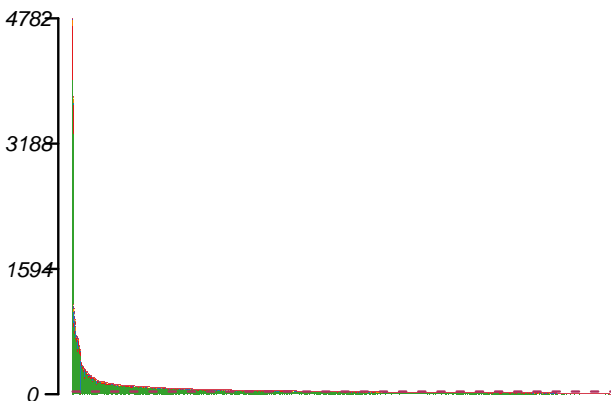Variant Classification  
summary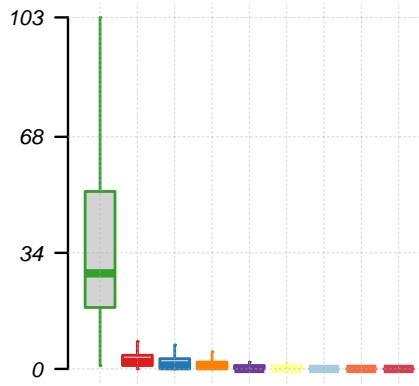Top 10  
mutated genes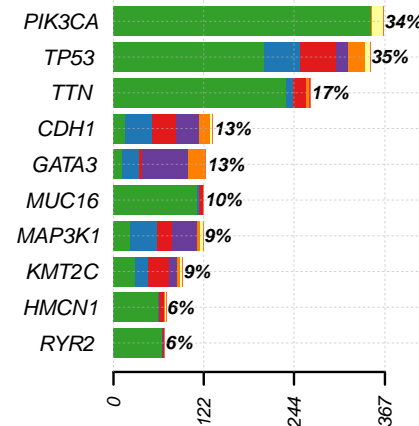

Supplement: Supplementary file 6 [file supplementary]
