# Supplementary figures and images for: Efficient Feature Extraction from High Sparse Binary Genotype Data for Genetic Risk Prediction by Deep Learning Method
Source: Preprints.org preprint supplement (doi:10.20944/preprints202208.0201.v1), 2022-08-10

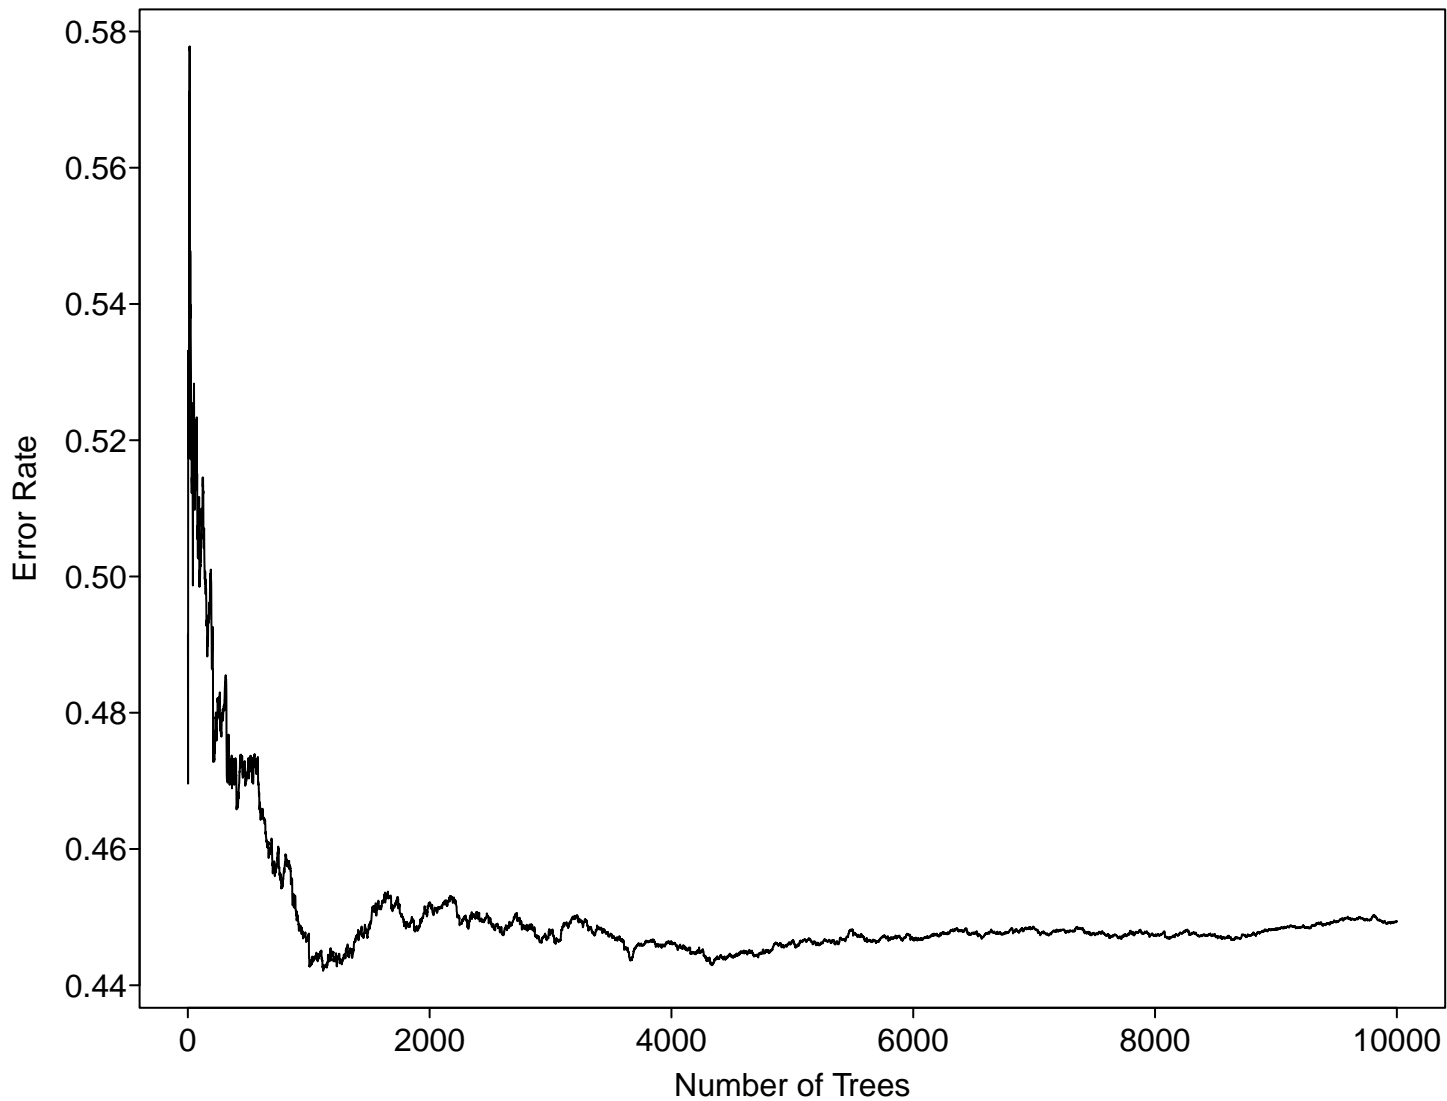

Supplement: Supplementary file 1 [file supplementary]

Partial Likelihood Deviance

287 275 271 269 265 268 249 230 217 187 150 94 53 15 5 1

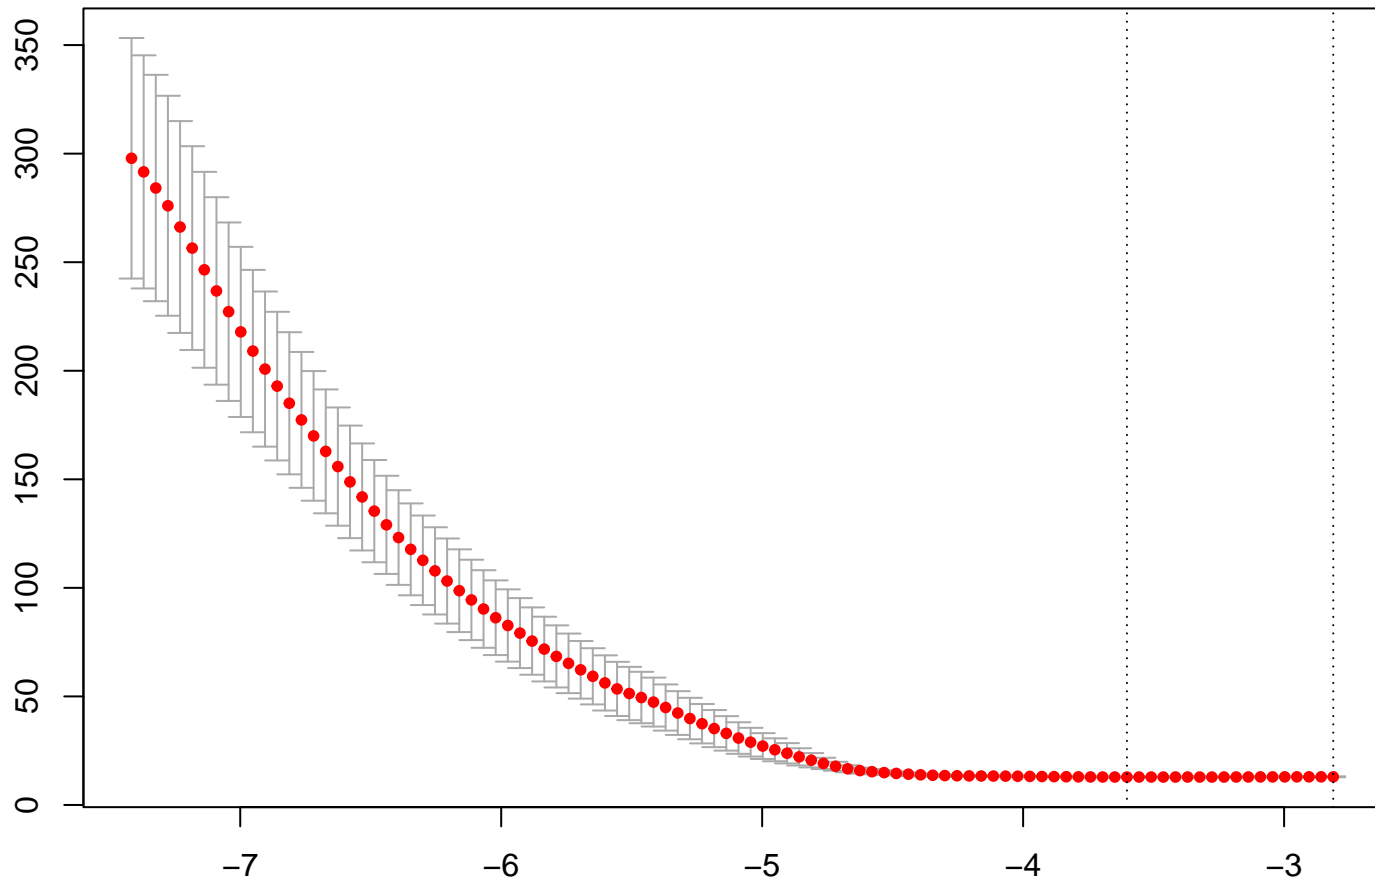

Log (Lambda)

Supplement: Supplementary file 3 [file supplementary]

Partial Likelihood Deviance

97 97 97 95 93 87 83 76 67 61 50 41 33 23 9 0

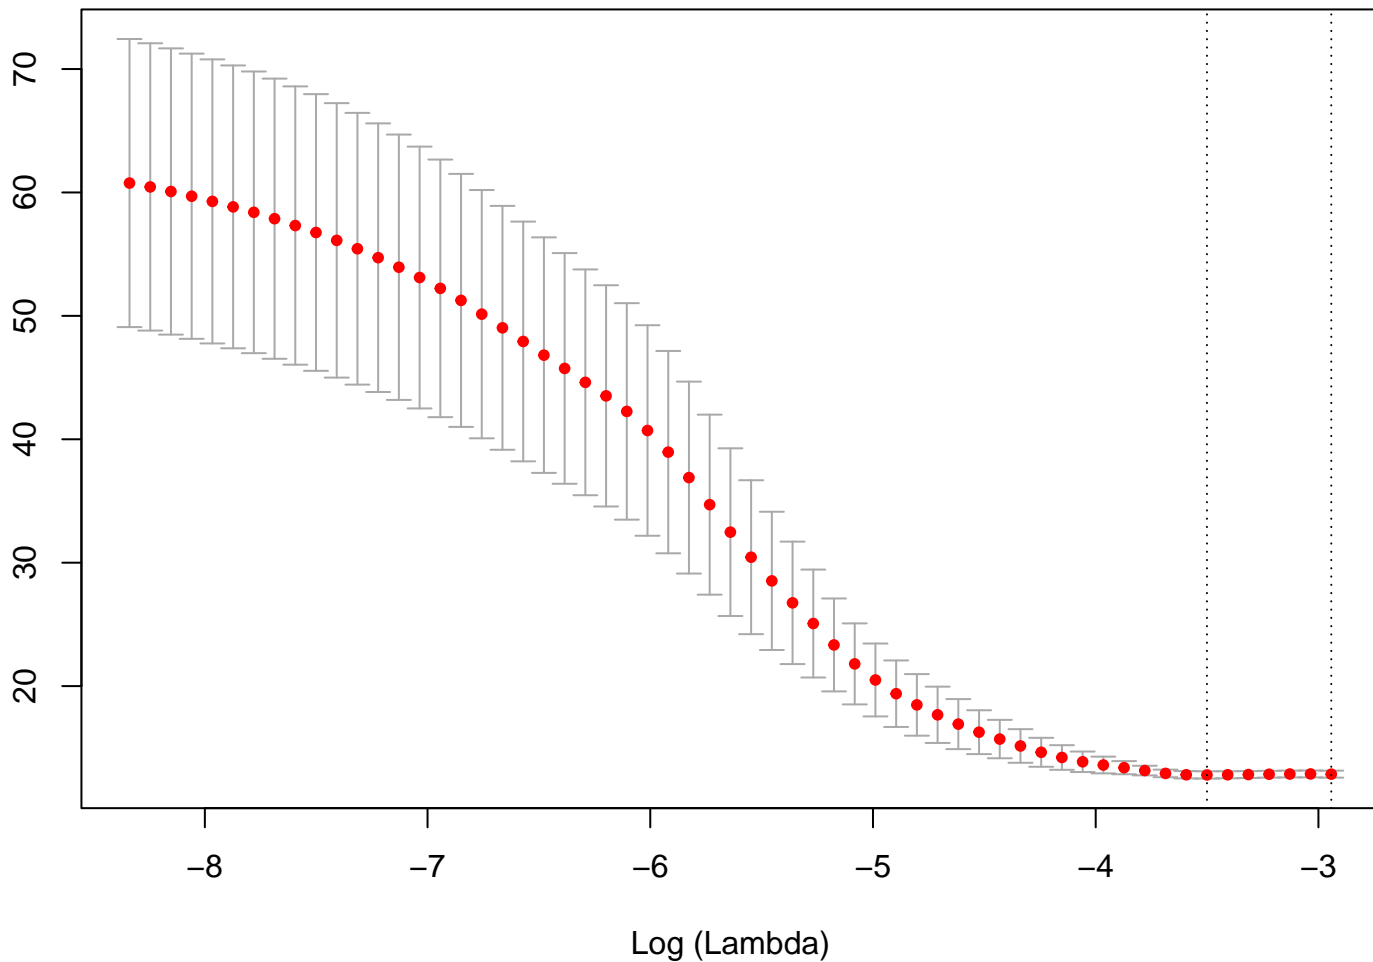

Supplement: Supplementary file 4 [file supplementary]

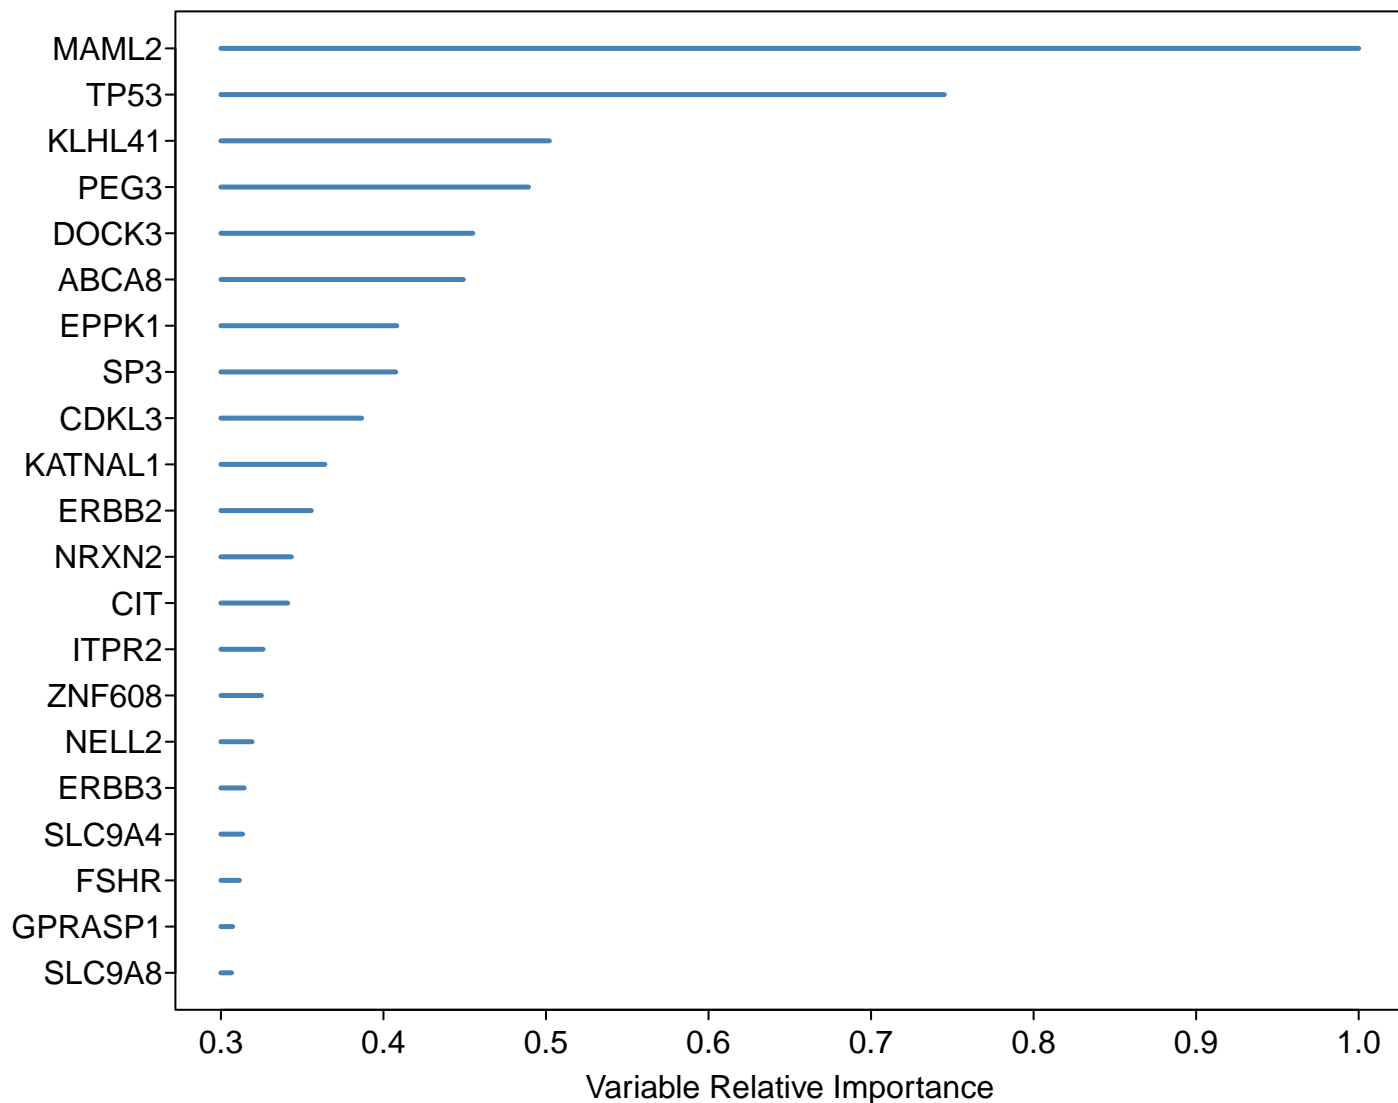

Supplement: Supplementary file 5 [file supplementary]

Partial Likelihood Deviance

100 99 98 97 92 92 87 83 81 68 58 52 48 34 25 11 4 2 2 1

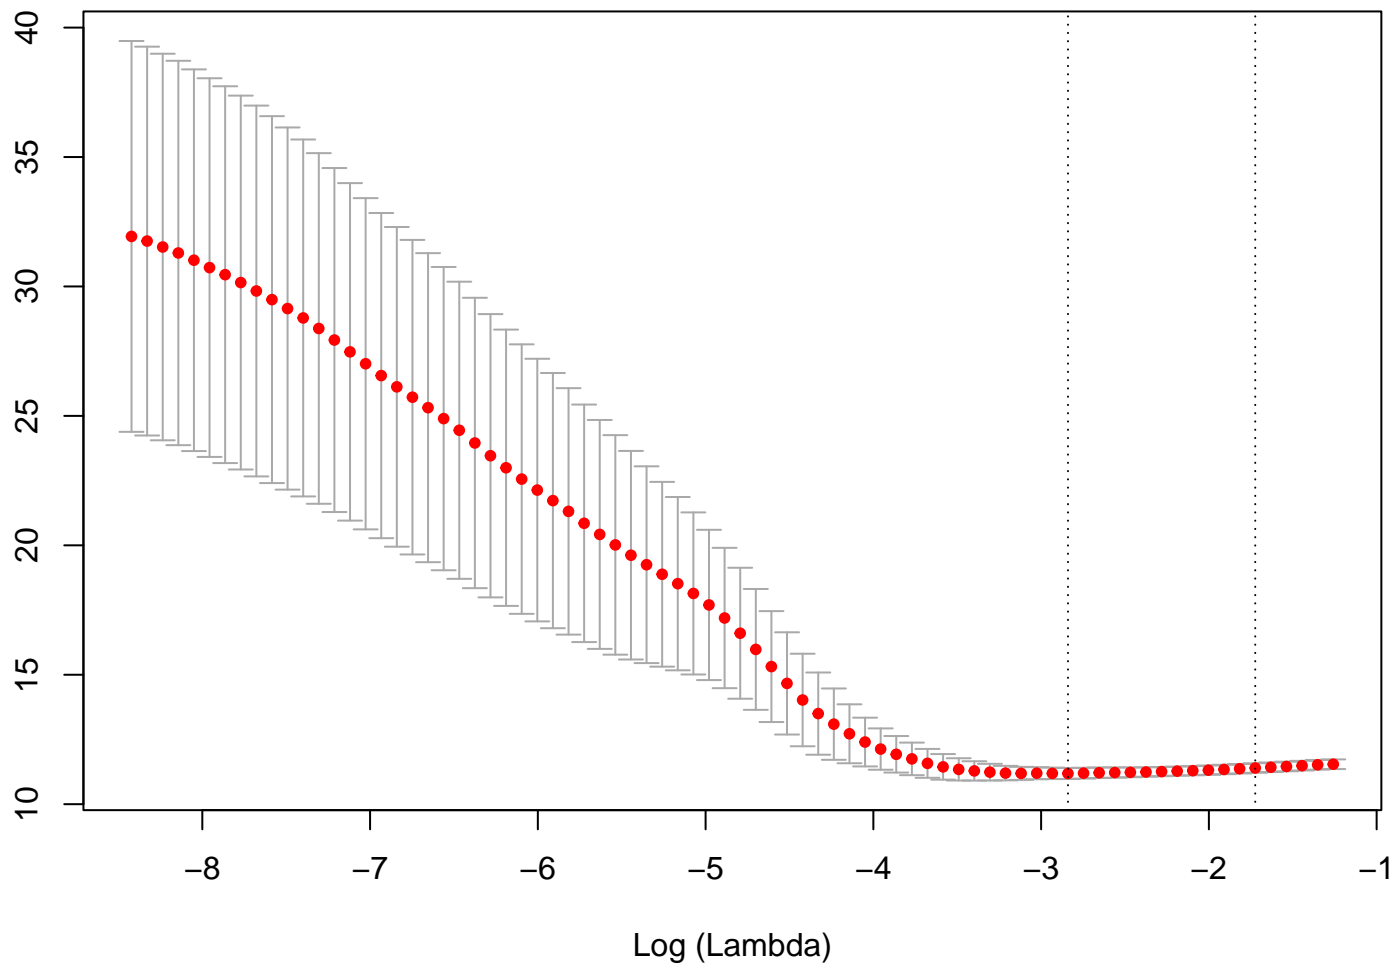

Supplement: Supplementary file 7 [file supplementary]

Genotypes

Genes

1747

186

3

57

1690

predictors

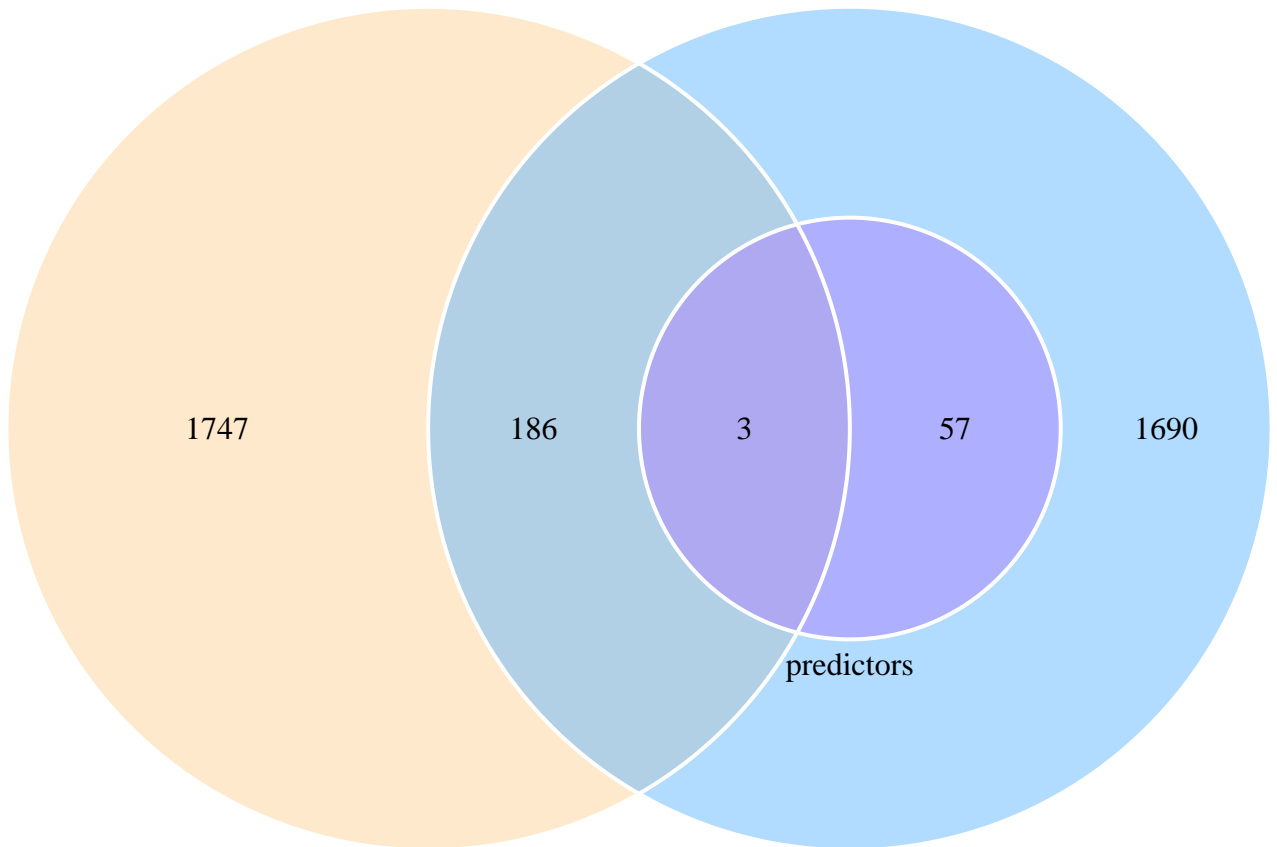

Supplement: Supplementary file 8 [file supplementary]

Partial Likelihood Deviance

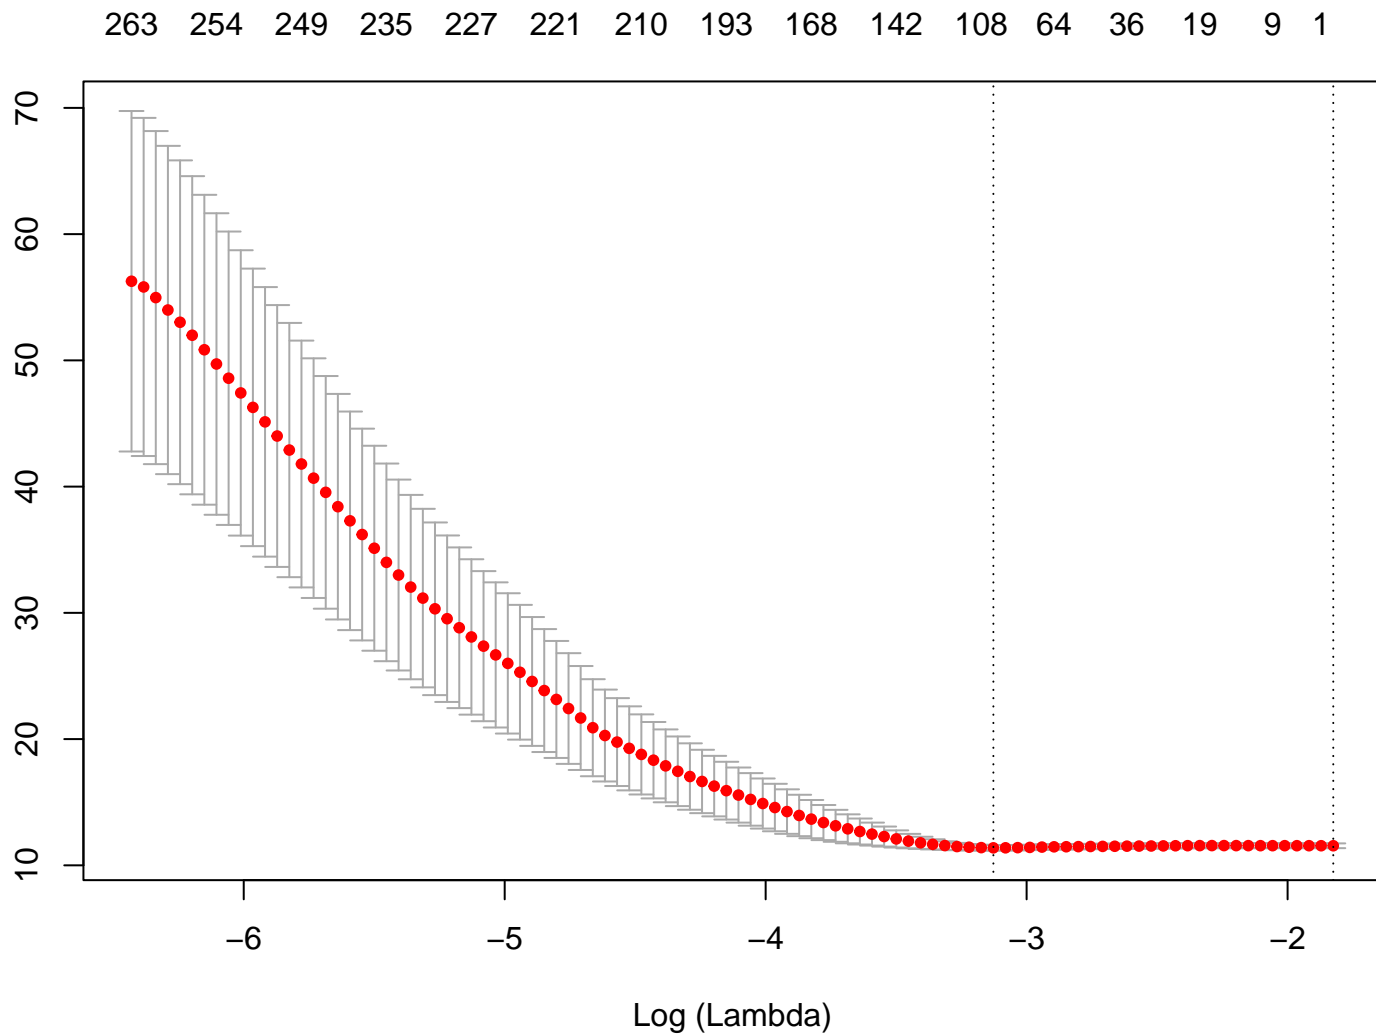

Supplement: Supplementary file 9 [file supplementary]

Partial Likelihood Deviance

229 228 218 220 218 226 223 214 215 196 184 164 112 34 8 0

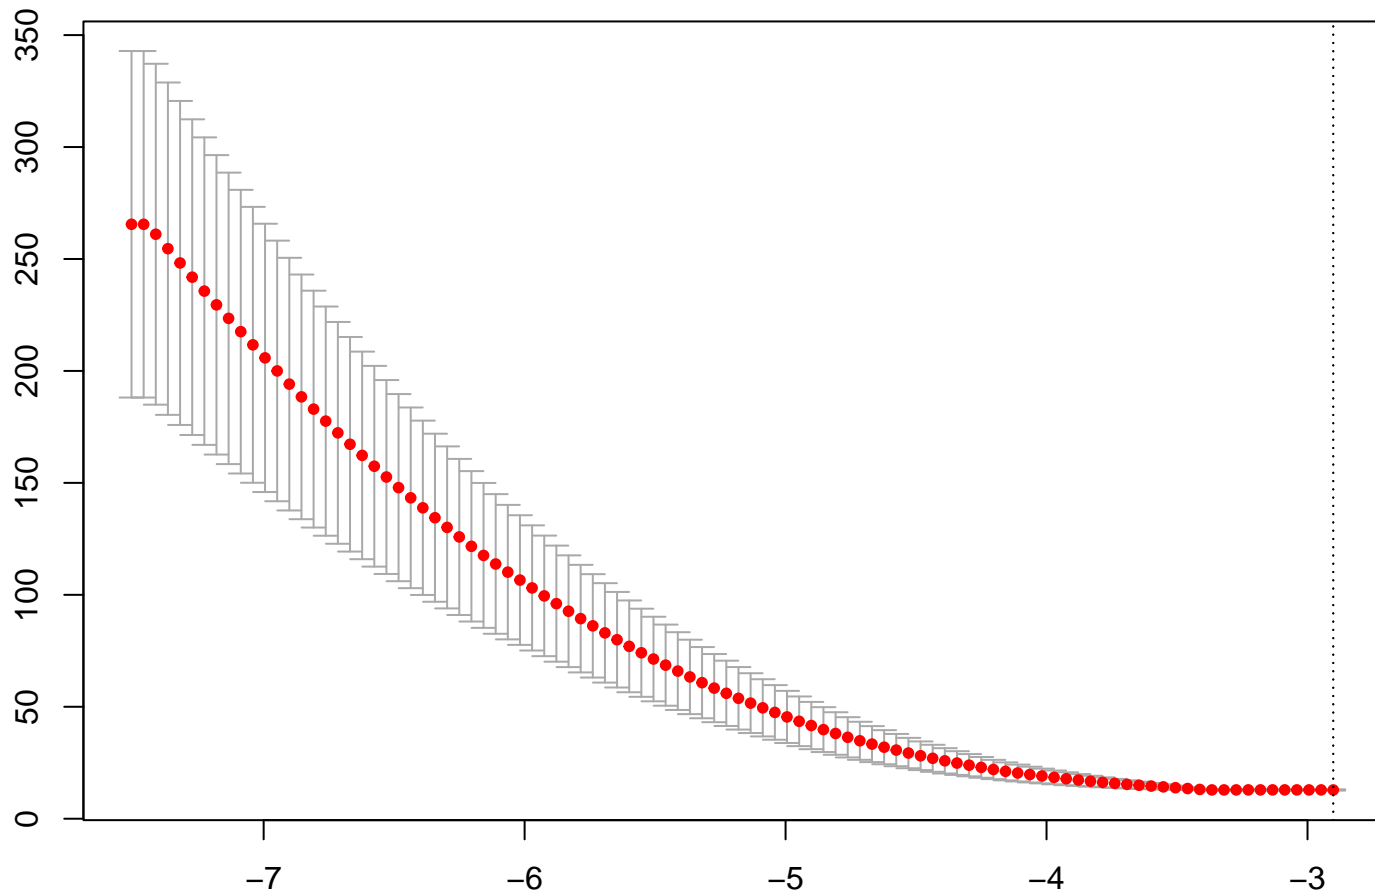

Log (Lambda)

Supplement: Supplementary file 10 [file supplementary]
